# Supplementary material for: Phosphorylation and Dephosphorylation of Beta-Amyloid Peptide in Model Cell Cultures: The Role of Cellular Protein Kinases and Phosphatases
Source: MDPI journal article supplement (doi:10.3390/life13010147), 2023-01-04
Supplement: s1 [file s1]

## Supplementary Figures

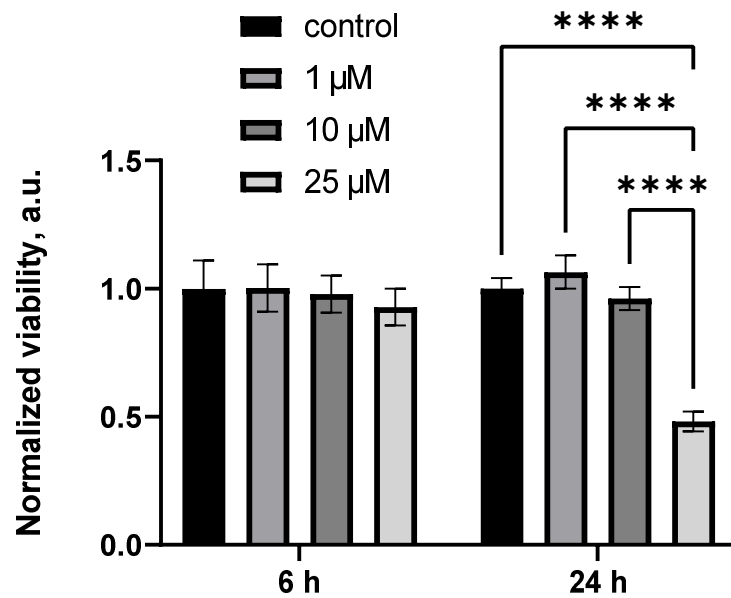

**Figure S1.** The toxicity of 1, 10 and 25 μM TBBz inhibitor for HEK293 cells at 6 and 24 hours of incubation measured with WST test. Data presented as means with SD normalized to respective controls in 6 and 24 hour groups. n=4, \*\*\*\* -  $p < 0.0001$  according to two-way ANOVA with post-hoc Tukey test.

1E4E11

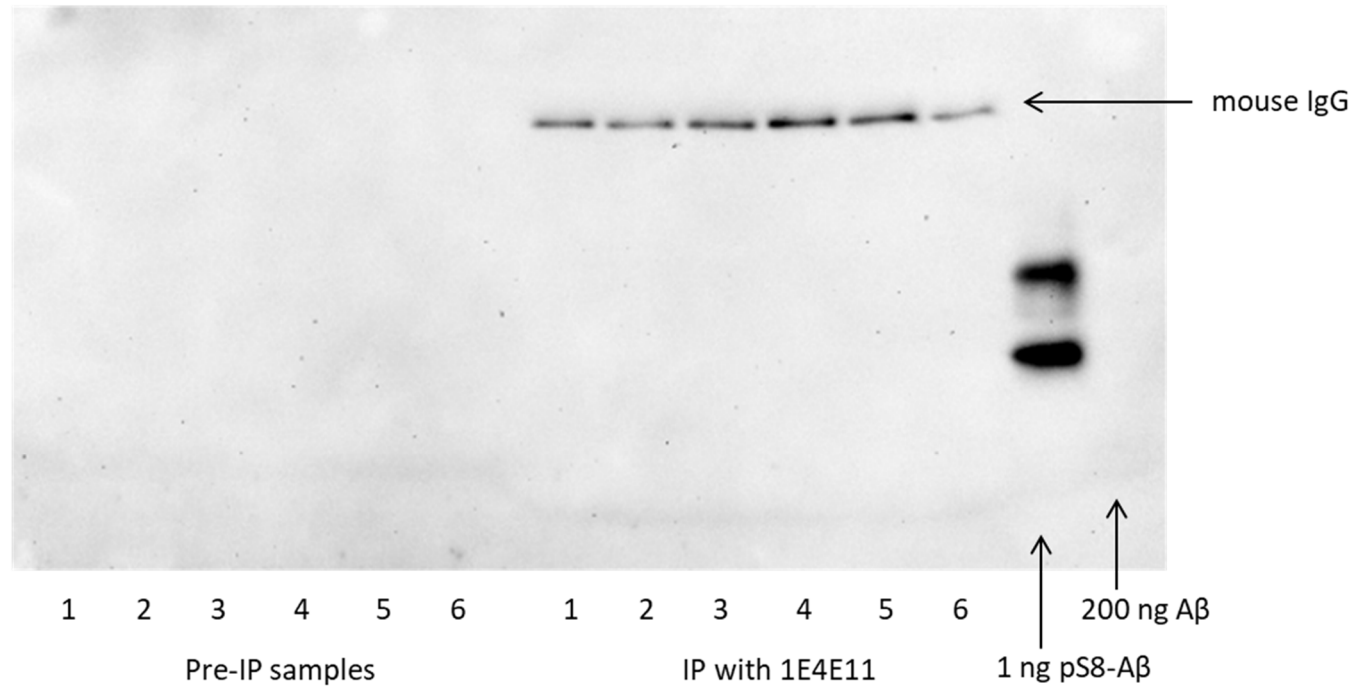

**Figure S2.** Phosphorylated Aβ in cell lysate of bEnd.3 cells treated with exogenous Aβ: pre-IP samples and samples immunoprecipitated with antibodies to pS8-Aβ ("1E4E11"). A photograph of nitrocellulose membrane after Western blotting, incubated with 1E4E11 antibodies, are shown.

6E10

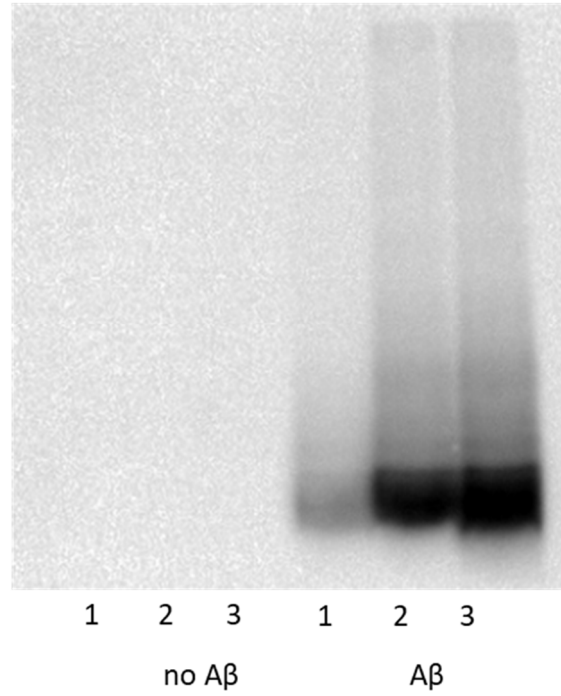

**Figure S3.** Total A $\beta$  in cell lysate of bEnd.3 cells treated with exogenous A $\beta$  ("A $\beta$ ") or in control samples ("no A $\beta$ "). A photograph of nitrocellulose membrane after Western blotting, incubated with antibodies to A $\beta$  epitope 7-14 ("6E10") are shown.

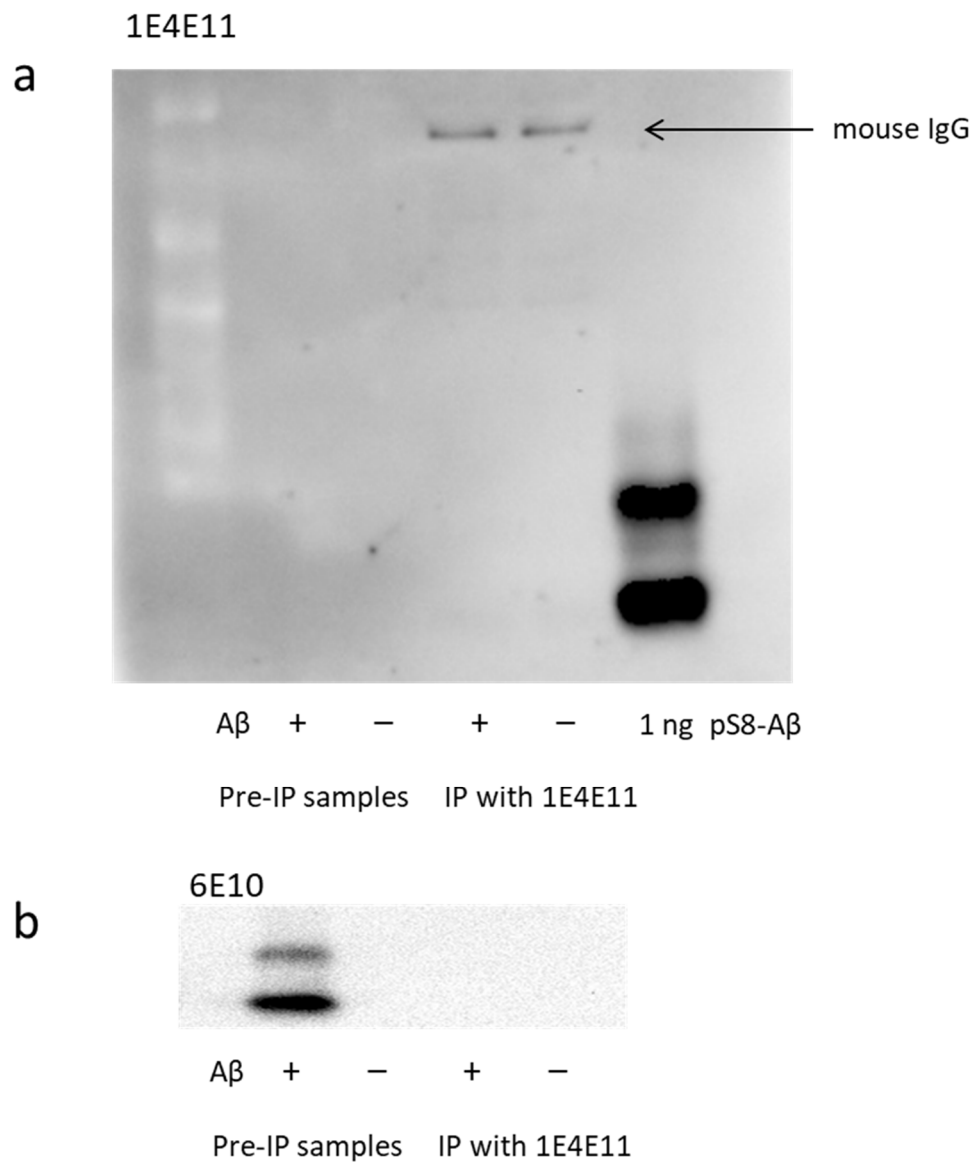

**Figure S4.** Phosphorylated A $\beta$  in cell media of bEnd.3 cells treated with exogenous A $\beta$ : pre-IP samples and samples immunoprecipitated with antibodies to pS8-A $\beta$  (“1E4E11”). A photograph of nitrocellulose membrane after Western blotting, incubated with 1E4E11 antibodies (**a**) and with 6E10 antibodies (**b**), are shown.

## Supplementary Methods

### *Measuring TBBz toxicity with WST test*

HEK293 were plated on 96-well plates (Greiner) and grown till confluent. Dry TBBz (the CK2 inhibitor) from Sigma-Aldrich was dissolved in DMSO to 11 mM and stored at -20 in aliquots. An aliquot was stepwise diluted in DMEM to 1, 10 or 25  $\mu$ M. The media in wells was replaced with DMEM containing TBBz or no TBBz (control). Cells were incubated for 6 or 24 hours in CO<sub>2</sub> incubator. Then, cell viability was measured with WST kit (CELLPRO-RO, Merck) according to manufacturer's protocol.
